# Supplementary material
Source: publisher figshare collection journal article supplement (https://aacr.figshare.com/articles/dataset/_/23814315)
Supplement: Supplementary file 1 [file 41783172]

**A**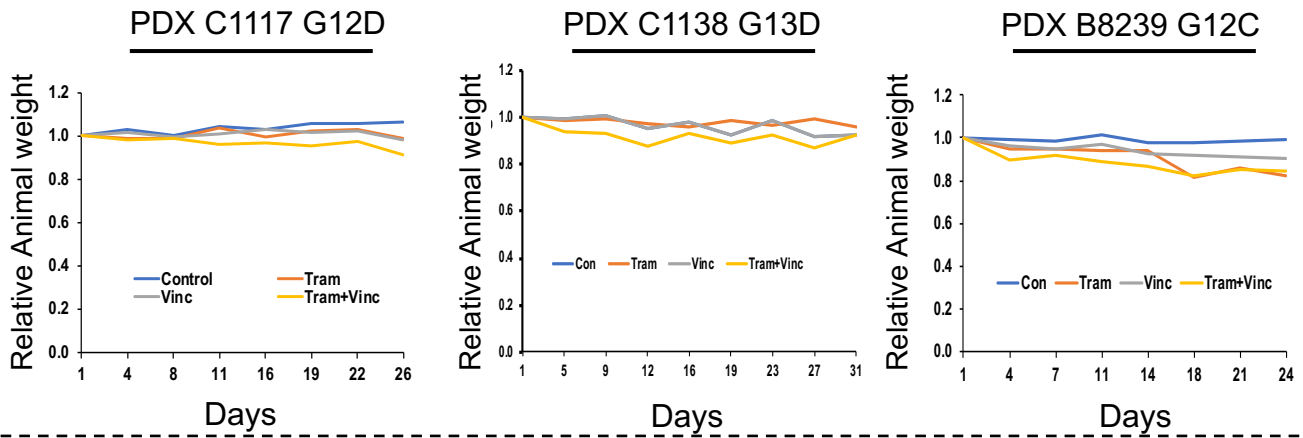**B**

| HISTOPATHOLOGY REPORT AND DIAGNOSIS |                       |                       |                                   |           |           |
|-------------------------------------|-----------------------|-----------------------|-----------------------------------|-----------|-----------|
| Species                             |                       | Mouse                 | Mouse                             | Mouse     | Mouse     |
| Treatment Group                     |                       | CONTROL               | CONTROL                           | CONTROL   | CONTROL   |
| Organ                               |                       | Lesion                | Lesion                            | Lesion    | Lesion    |
| Block No.                           | Morphologic Diagnosis | Grade                 | Grade                             | Grade     | Grade     |
| 1                                   | LUNG                  | Hemorrhage,minimal,mf | N                                 | N         | N         |
| 2                                   | LIVER                 | N                     | Infiltration,mononuclear, minimal | N         | N         |
| 3                                   | KIDNEY                | N                     | N                                 | N         | N         |
| 4                                   | SPLEEN                | N                     | N                                 | N         | N         |
| 5                                   | INTESTINE             | N                     | N                                 | N         | N         |
| Treatment Group                     |                       | TRAM                  | TRAM                              | TRAM      | TRAM      |
| 1                                   | LUNG                  | Hemorrhage,minimal,mf | N                                 | N         | N         |
| 2                                   | LIVER                 | N                     | N                                 | N         | N         |
| 3                                   | KIDNEY                | N                     | N                                 | N         | N         |
| 4                                   | SPLEEN                | N                     | N                                 | N         | N         |
| 5                                   | INTESTINE             | N                     | N                                 | N         | N         |
| Treatment Group                     |                       | VINC                  | VINC                              | VINC      | VINC      |
| 1                                   | LUNG                  | N                     | N                                 | N         | N         |
| 2                                   | LIVER                 | N                     | Infiltration,mononuclear, minimal | N         | N         |
| 3                                   | KIDNEY                | N                     | N                                 | N         | N         |
| 4                                   | SPLEEN                | N                     | N                                 | N         | N         |
| 5                                   | INTESTINE             | N                     | N                                 | N         | N         |
| Treatment Group                     |                       | TRAM+VINC             | TRAM+VINC                         | TRAM+VINC | TRAM+VINC |
| 1                                   | LUNG                  | N                     | N                                 | N         | N         |
| 2                                   | LIVER                 | N                     | N                                 | N         | N         |
| 3                                   | KIDNEY                | N                     | N                                 | N         | N         |
| 4                                   | SPLEEN                | N                     | N                                 | N         | N         |
| 5                                   | INTESTINE             | N                     | N                                 | N         | N         |

| LEGEND                                                                    |
|---------------------------------------------------------------------------|
| N = Normal tissue or No significant lesion observed                       |
| A = Abnormal tissue (Lesion present)                                      |
| P = The lesion is present, but not graded                                 |
| S = Suspected/Presumptive diagnosis (needs more tests to confirm the Dx.) |
| MF-Multifocal                                                             |
| WNL=Within normal Limits                                                  |

**Supplementary Figure 4: Combination of trametinib and vincristine is well tolerated by mice. (A) Changes in body weight of mice following treatment with vehicle (C), trametinib (Tram), vincristine (Vinc), or the combination (Tram+Vinc) over time. (B) Summary of histopathological reports showing organs examined and lesion grade.**
